# Supplementary material for: The Rhizobacterium Pseudomonas alcaligenes AVO110 Induces the Expression of Biofilm-Related Genes in Response to Rosellinia necatrix Exudates
Source: MDPI journal article supplement (doi:10.3390/microorganisms9071388), 2021-06-25
Supplement: s1 [file s1]

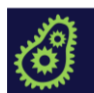

## Article

# The rhizobacterium *Pseudomonas alcaligenes* AVO110 induces the expression of biofilm-related genes in response to *Rosellinia necatrix* exudates

Adrián Pintado <sup>1,2</sup>, Isabel Pérez-Martínez <sup>1,2</sup>, Isabel M. Aragón <sup>1,2</sup>, José Antonio Gutiérrez-Barranquero <sup>2,3</sup>, Antonio de Vicente <sup>2,3</sup>, Francisco M. Cazorla <sup>2,3,\*</sup> and Cayo Ramos <sup>1,2,\*</sup>

<sup>1</sup> Área de Genética, Facultad de Ciencias, Universidad de Málaga, Campus Teatinos, E-29010 Málaga, Spain; apintado@uma.es (A.P.; ORCID 0000-0001-6045-3018); isabel.aragon31@gmail.com (IA); isaperezmart@gmail.com (I.P.-M.); crr@uma.es (C.R.; ORCID 0000-0002-2362-5041)

<sup>2</sup> Departamento de Microbiología y Protección de Cultivos, Instituto de Hortofruticultura Subtropical y Mediterránea «La Mayora», Universidad de Málaga-Consejo Superior de Investigaciones Científicas (IHSM-UMA-CSIC); Extensión Campus de Teatinos, 29010 Málaga, Spain; e-mail@e-mail.com

<sup>3</sup> Departamento de Microbiología, Universidad de Málaga, Campus Teatinos, E-29010 Málaga, Spain; jagutierrez@uma.es (J.A.G.-B.; ORCID 0000-0003-1810-699X); adevicente@uma.es (A.V.; ORCID 0000-0003-2716-9861); cazorla@uma.es (F.M.C.; ORCID 0000-0003-0798-0964)

\* Correspondence: crr@uma.es (C.R.), Tel.: (+34-952131957); cazorla@uma.es (F.M.C.), Tel.: (+34-952137587)

## Supplementary Material

**Figure S1.** Core and pan-genome analysis of *P. alcaligenes* strains present in (a) group I and (b) groups I and II. Boxes indicate changes in number of gene families relative to number of genes added sequentially; median values denoted with horizontal black line and standard deviation with vertical bars. Pie chart shows frequency distribution of ortholog groups of genes.

**Figure S2.** Predicted biological functions of genes present in specific region of *P. alcaligenes* AVO110. Specific genes were classified by their predicted biological function using Sma3s\_v2 software [56].

**Table S1.** Primers used in this study.

**Table S2.** Relevant genes encoded in exclusive genomic region identified with GView in *P. alcaligenes* AVO110.

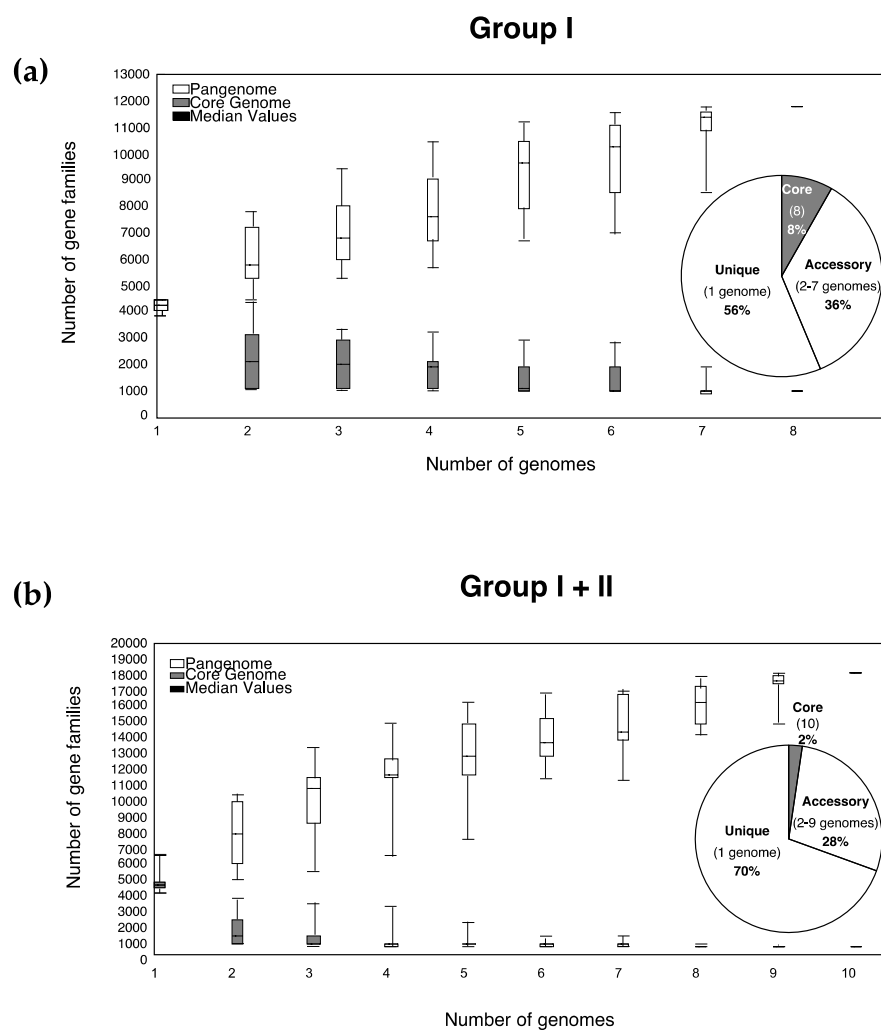

**Figure S1.** Core and pan-genome analysis of *P. alcaligenes* strains present in (a) group I and (b) groups I and II. Boxes indicate changes in number of gene families relative to number of genes added sequentially; median values denoted with horizontal black line and standard deviation with vertical bars. Pie chart shows frequency distribution of ortholog groups of genes.

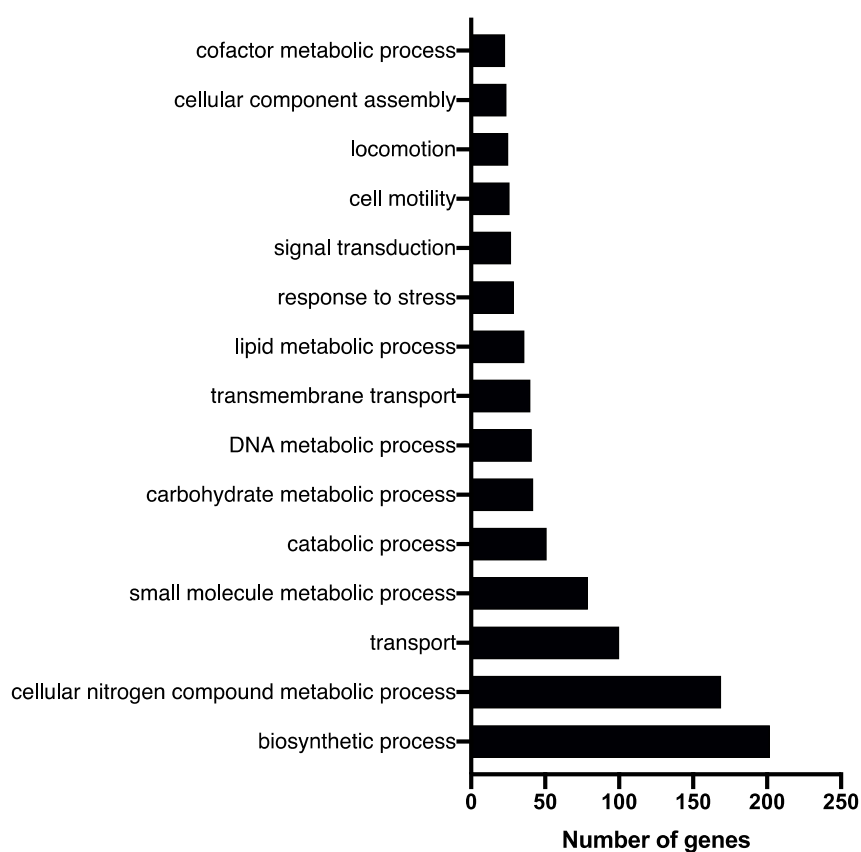

**Figure S2.** Predicted biological functions of genes present in specific region of *P. alcaligenes* AVO110. Specific genes were classified by their predicted biological function using Sma3s\_v2 software [56].

Table S1. Primers used in this study.

| Primer name/Use                                                                           | Sequence 5' - 3'            |
|-------------------------------------------------------------------------------------------|-----------------------------|
| <b>Construction of <i>P. alcaligenes</i> AVO110 <math>\Delta</math><i>cmpA</i> mutant</b> |                             |
| TAcmpA-F                                                                                  | GAATTCCTGCAGGTGTTGCAGGAC    |
| TAcmpA-R                                                                                  | GGATCCATTTCGCATACATGGCTCAGT |
| TDcmpA-F                                                                                  | GGATCCGCCACGACCATTTCATGCG   |
| TDcmpA-R                                                                                  | GCGGCCGCTGTCCACCGCTTCCGGTA  |
| <b><i>cmpA</i> probe</b>                                                                  |                             |
| cmpA-625-F                                                                                | ACTGCCTGTTCCACTTCACC        |
| cmpA-1060-R                                                                               | TGTTCCATGCTCTCGAACAG        |
| <b>Sequencing of <i>cmpA</i> amplicons</b>                                                |                             |
| cmpA-912-F                                                                                | ATGCTCAATGTGGTGCAGAG        |
| cmpA-2540-R                                                                               | AGTCGATACCGACGATCCAG        |
| cmpA-544-R                                                                                | GTTGAGCAGCGAATTGCTGC        |
| cmpA-1088-R                                                                               | GCAAGCTGTGCGAGAATCTTG       |
| <b><i>cmpA</i> construction</b>                                                           |                             |
| cmpAEcoRI-F                                                                               | CCCGAATTCACCTATCTCAACACCCTG |
| cmpASacI-R                                                                                | GAGGAGCTCGGCGCATGAATGGTCGT  |
| <b>Construction of <i>cmpA</i>-GGAAF mutant allele</b>                                    |                             |
| GGAAFcmpA-F                                                                               | TGGGTGGCGCCGCGTTCATCAT      |
| GGAAFcmpA-R                                                                               | ATGATGAACGCGCGCCACCCA       |
| <b>Construction of <i>cmpA</i>-AAL mutant allele</b>                                      |                             |
| AALcmpA-F                                                                                 | GGCTTCGCGGCGCTGGTGCCT       |
| AALcmpA-R                                                                                 | AGCGCACCAGCGCCGCGAAGCC      |
| <b>qRT-PCR assays of <i>P. alcaligenes</i> AVO110 genes</b>                               |                             |
| 19020S-F                                                                                  | GGGTGGTCTGGTGAATTTG         |
| 19020S-R                                                                                  | AGCACAGCGTCTTTCAGGC         |
| 41690S-F                                                                                  | TCCCGAACAGGTAAACAAGG        |
| 41690S-R                                                                                  | CTACCGCCAGATAGGTCTCG        |
| 16990S-F                                                                                  | CAGCATGAACAGCGACCAG         |
| 16990S-R                                                                                  | CCAGCCCAGGTACAGCTC          |
| 19030S-F                                                                                  | CGGTCTGTGTGGATTTCTCA        |
| 19030S-R                                                                                  | ATTGAGCGGTTGCCAGAC          |
| 17000S-F                                                                                  | AGTTCCACAGGACGACAAGG        |
| 17000S-R                                                                                  | CCAACTGCTGGTGAATATGC        |
| 16980S-F                                                                                  | TACGTGGCTTTCCTGACCCA        |
| 16980S-R                                                                                  | GCACTGCTTGATGGTTGC          |
| 21310S-F                                                                                  | GTATTCCCTGTGACGCCTGT        |
| 21310S-R                                                                                  | CTGGAGTTTGGTTGGCTCAT        |
| 19120S-F                                                                                  | CTGAATGCCGAGAGCCTGGT        |
| 19120S-R                                                                                  | ACGTTGAGCATGGTGGTCT         |

---

|                  |                       |
|------------------|-----------------------|
| 21300S-F         | AAGTGGATCTCGCACCTTGA  |
| 21300S-R         | GCTGCTGGCACATGACCTT   |
| 17010S-F         | AAGGCTATACGGTGGACTGG  |
| 17010S-R         | GGGCGGTAAGGATCAGCAC   |
| 16970S-F         | GGCTCGATTCTCAACGGTTA  |
| 16970S-R         | TGACGAACTGGTGCTTCTTG  |
| 01790S-F         | GACGGCATCACCTTCCTG    |
| 01790S-R         | GCTGTCCTGGAGAAAATCG   |
| 00470I-F         | ACAAGGTGCCGTTCTCTAC   |
| 00470I-R         | GCCAGACCCAGGTAGATCAG  |
| 00480I-F         | TACAAGAACTGCCGCATCTG  |
| 00480I-R         | GCGTATTCCAGCAGCACCT   |
| 39320I-F         | CACCAAGCACTTCAACGAGA  |
| 39320I-R         | TCGACGAGCACCTTACGC    |
| 11670I-F         | GATGACCCGTTCTTCTCC    |
| 11670I-R         | AGGGCGTCTTCACCGTAGA   |
| 00490I-F         | ACGGCAACAACCTGATGG    |
| 00490I-R         | GGTAGGAGTTGGCGTTGG    |
| 21360I-F         | CCCTCACCACACCTATCAGC  |
| 21360I-R         | AGCCATTGCTTCGGGTATC   |
| 08760I-F         | GGCTCGCACTTTCCTTCTT   |
| 08760I-R         | CTCGACCAGCTCCACCTC    |
| 44070I-F         | CCCTGTTCAAGAGCAAGTGG  |
| 44070I-R         | AAAGGTCTGGGTCGTCCTCT  |
| 42920I-F         | TGCAGGTGTGGCTGAAACTC  |
| 42920I-R         | GCACGATCTTCTCAACCTTGC |
| 20110I-F         | AGCAACAGTGTCGGCAACTT  |
| 20110I-R         | TCGCATAGTCGAGGAAGGTC  |
| 44120I-F         | CCGCACCCTCTACTACGC    |
| 44120I-R         | CTCGGAACTGTCGTTGAGGT  |
| 39300I-F         | TTCTACGCCGAGGATCTGAG  |
| 39300I-R         | CGCACGCAGTTCAGGTAGTA  |
| <i>rpoD</i> QFwd | GCATCCTCGGTGAATACCAG  |
| <i>rpoD</i> QRev | CCATCTCCTTCTTCTTCGTC  |

---

**Table S2.** Relevant genes encoded in exclusive genomic region identified with GView in *P. alcaligenes* AVO110.

| Accession number           | Description                                   |
|----------------------------|-----------------------------------------------|
| <b>c-di-GMP metabolism</b> |                                               |
| A9179_RS01010              | diguanylate cyclase                           |
| A9179_RS02870              | diguanylate cyclase                           |
| A9179_RS05330              | EAL domain-containing protein                 |
| A9179_RS05980              | EAL domain-containing protein                 |
| A9179_RS07085              | diguanylate cyclase                           |
| A9179_RS07935              | diguanylate cyclase                           |
| A9179_RS08950              | diguanylate cyclase                           |
| A9179_RS09580              | EAL domain-containing protein ( <i>cmpA</i> ) |
| A9179_RS10400              | diguanylate cyclase                           |
| A9179_RS11905              | diguanylate cyclase                           |
| A9179_RS11915              | EAL domain-containing protein                 |
| A9179_RS12015              | EAL domain-containing protein                 |
| A9179_RS12450              | EAL domain-containing protein                 |
| A9179_RS13275              | diguanylate cyclase                           |
| A9179_RS13525              | diguanylate cyclase                           |
| A9179_RS13810              | diguanylate cyclase                           |
| A9179_RS13845              | diguanylate cyclase                           |
| A9179_RS14655              | EAL domain-containing protein                 |
| A9179_RS16485              | EAL domain-containing protein                 |
| A9179_RS16570              | diguanylate cyclase                           |
| A9179_RS20705              | diguanylate cyclase                           |
| A9179_RS21205              | EAL domain-containing protein                 |
| A9179_RS21270              | diguanylate cyclase                           |
| A9179_RS22250              | EAL domain-containing protein                 |
| <b>Chemotaxis</b>          |                                               |
| A9179_RS11925              | chemotaxis protein                            |
| <b>A9179_RS00870</b>       | <b>chemotaxis protein CheB</b>                |
| A9179_RS00875              | chemotaxis protein CheD                       |
| A9179_RS00885              | chemotaxis protein CheW                       |
| A9179_RS00895              | chemotaxis protein CheW                       |
| A9179_RS00910              | methyl-accepting chemotaxis protein           |
| A9179_RS02050              | methyl-accepting chemotaxis protein           |
| A9179_RS06355              | methyl-accepting chemotaxis protein           |
| A9179_RS09555              | chemotaxis protein CheW                       |
| A9179_RS09560              | chemotaxis protein CheR                       |
| A9179_RS09565              | chemotaxis protein CheW                       |

|               |                                     |
|---------------|-------------------------------------|
| A9179_RS17360 | chemotaxis protein                  |
| A9179_RS19375 | methyl-accepting chemotaxis protein |
| A9179_RS20060 | methyl-accepting chemotaxis protein |

#### Flagellar and type IV pili proteins

|               |                                                                            |
|---------------|----------------------------------------------------------------------------|
| A9179_RS01330 | Flp pilus assembly complex ATPase component<br>TadA                        |
| A9179_RS02195 | PilN domain-containing protein                                             |
| A9179_RS02205 | pilus assembly protein PilP                                                |
| A9179_RS04850 | prepilin-type N-terminal cleavage/methylation<br>domain-containing protein |
| A9179_RS06045 | PilZ domain-containing protein                                             |
| A9179_RS06055 | flagellar type III secretion system protein FlhB                           |
| A9179_RS06060 | flagellar biosynthetic protein FliR                                        |
| A9179_RS06065 | flagellar type III secretion system protein FliQ                           |
| A9179_RS06070 | flagellar type III secretion system pore protein<br>FliP                   |
| A9179_RS06075 | flagellar motor switch protein FliN                                        |
| A9179_RS06080 | FliM/FliN family flagellar motor switch protein                            |
| A9179_RS06090 | flagellar hook-basal body complex protein FliE                             |
| A9179_RS06095 | flagellar M-ring protein FliF                                              |
| A9179_RS06100 | flagellar motor switch protein FliG                                        |
| A9179_RS06105 | flagellar assembly protein H                                               |
| A9179_RS06110 | flagellar protein export ATPase FliI                                       |
| A9179_RS06115 | flagellar FliJ family protein                                              |
| A9179_RS06120 | flagellar biosynthesis anti-sigma factor FlgM                              |
| A9179_RS06125 | flagellar export chaperone FlgN                                            |
| A9179_RS06130 | flagellar filament capping protein FliD                                    |
| A9179_RS06135 | flagellar export chaperone FliS                                            |
| A9179_RS06145 | flagellar hook-length control protein FliK                                 |
| A9179_RS06150 | flagellar basal body-associated FliL family pro-<br>tein                   |
| A9179_RS06155 | FliA/WhiG family RNA polymerase sigma factor                               |
| A9179_RS06160 | flagellar motor stator protein MotA                                        |
| A9179_RS06165 | OmpA family protein                                                        |
| A9179_RS06185 | flagellar basal body P-ring formation protein<br>FlgA                      |
| A9179_RS06190 | flagellar basal body rod protein FlgB                                      |
| A9179_RS06195 | flagellar basal body rod protein FlgC                                      |
| A9179_RS06200 | flagellar hook assembly protein FlgD                                       |
| A9179_RS06205 | flagellar basal body protein FlgE                                          |
| A9179_RS06210 | flagellar basal body rod protein FlgF                                      |

|                      |                                                                         |
|----------------------|-------------------------------------------------------------------------|
| A9179_RS06215        | flagellar basal-body rod protein FlgG                                   |
| A9179_RS06220        | flagellar basal body L-ring protein FlgH                                |
| A9179_RS06225        | flagellar basal body P-ring protein FlgI                                |
| A9179_RS06235        | flagellar hook-associated protein FlgK                                  |
| A9179_RS06240        | flagellar hook-associated protein FlgL                                  |
| A9179_RS09050        | flagellar brake protein                                                 |
| A9179_RS09055        | flagellar export chaperone FlgN                                         |
| A9179_RS09060        | flagellar biosynthesis anti-sigma factor FlgM                           |
| A9179_RS09065        | flagellar basal body P-ring formation protein FlgA                      |
| A9179_RS09175        | flagellar protein FlaG                                                  |
| A9179_RS09180        | flagellar filament capping protein FliD                                 |
| A9179_RS09185        | flagellar export chaperone FliS                                         |
| A9179_RS09190        | flagellar export chaperone FliS                                         |
| A9179_RS09195        | flagellar protein FliT                                                  |
| A9179_RS09260        | flagellar hook-length control protein FliK                              |
| A9179_RS09355        | flagellar motor protein MotD                                            |
| <b>A9179_RS09465</b> | <b>Flp family type IVb pilin</b>                                        |
| <b>A9179_RS09470</b> | <b>prepilin peptidase</b>                                               |
| A9179_RS09480        | Flp pilus assembly protein CpaB                                         |
| A9179_RS09485        | pilus assembly protein N-terminal domain-containing protein             |
| A9179_RS09500        | pilus assembly protein                                                  |
| A9179_RS09505        | pilus assembly protein                                                  |
| <b>A9179_RS09515</b> | <b>Flp pilus assembly complex ATPase component TadA</b>                 |
| A9179_RS13420        | PilZ domain-containing protein                                          |
| A9179_RS14710        | pilus assembly protein PilY                                             |
| A9179_RS14720        | PilW family protein                                                     |
| A9179_RS14730        | prepilin-type N-terminal cleavage/methylation domain-containing protein |
| A9179_RS16440        | PilZ domain-containing protein                                          |
| A9179_RS17450        | PilZ domain-containing protein                                          |
| A9179_RS18550        | pilin                                                                   |
| A9179_RS18640        | PilZ domain-containing protein                                          |
| A9179_RS18685        | prepilin-type N-terminal cleavage/methylation domain-containing protein |
| A9179_RS18690        | pilus assembly protein                                                  |
| A9179_RS18695        | pilus assembly protein PilX                                             |
| A9179_RS18700        | prepilin-type N-terminal cleavage/methylation domain-containing protein |
| A9179_RS20005        | flagellin                                                               |



|               |                                                                         |
|---------------|-------------------------------------------------------------------------|
| A9179_RS20010 | prepilin-type N-terminal cleavage/methylation domain-containing protein |
| A9179_RS20015 | pilus assembly protein PilY                                             |
| A9179_RS20025 | prepilin-type N-terminal cleavage/methylation domain-containing protein |
| A9179_RS20130 | prepilin-type N-terminal cleavage/methylation domain-containing protein |
| A9179_RS20135 | prepilin-type cleavage/methylation domain-containing protein            |
| A9179_RS20145 | prepilin-type N-terminal cleavage/methylation domain-containing protein |
| A9179_RS20150 | prepilin-type N-terminal cleavage/methylation domain-containing protein |
| A9179_RS20195 | PilN domain-containing protein                                          |
| A9179_RS22575 | PilZ domain-containing protein                                          |

<sup>a</sup>Bolded accession numbers (NCBI, National Center for Biotechnology Information) indicate genes with expression was analyzed by qRT-PCR in *R. necatrix* exudates-containing medium (BM-RE medium).

## References

56. Casimiro-Soriguer, C.S.; Muñoz-Mérida, A.; Pérez-Pulido, A.J. Sma3s: A universal tool for easy functional annotation of proteomes and transcriptomes. *Proteomics* **2017**, *17*, doi:10.1002/pmic.201700071.
